# Supplementary material for: Eco-HAB as a fully automated and ecologically relevant assessment of social impairments in mouse models of autism
Source: eLife. 2016 Oct 12;5:e19532. doi: 10.7554/eLife.19532 (PMC5092044; doi:10.7554/eLife.19532)
Supplement: Figure 3—source data 1. — The names of the Excel sheets refer to corresponding figures and contain data used for analysis of the behavioral measures obtained by the implementation of Eco-HAB.py software (see 'Materials and methods'). DOI: http://dx.doi.org/10.7554/eLife.19532.012 [file elife-19532-fig3-data1.xlsx]

## Sheet: Sheet1
cohort name and date of the exeriment	no.of animal within a cohort	Eco-HAB social preference score
C57 CTRL cohort 1 25.07.14	1	1.42178
C57 CTRL cohort 1 25.07.14	2	0.904401
C57 CTRL cohort 1 25.07.14	3	0.419516
C57 CTRL cohort 1 25.07.14	4	0.677242
C57 CTRL cohort 1 25.07.14	5	0.73486
C57 CTRL cohort 1 25.07.14	6	excluded
C57 CTRL cohort 1 25.07.14	7	0.591401
C57 CTRL cohort 1 25.07.14	8	0.458453
C57 CTRL cohort 1 25.07.14	9	1.52517
C57 CTRL cohort 1 25.07.14	10	0.870519
C57 CTRL cohort 1 25.07.14	11	2.55971
C57 CTRL cohort 1 25.07.14	12	0.544321
C57 CTRL cohort 1 25.07.14	13	0.630501
C57 CTRL cohort 2 30.07.14	1	5.00691
C57 CTRL cohort 2 30.07.14	2	1.5378
C57 CTRL cohort 2 30.07.14	3	0.147912
C57 CTRL cohort 2 30.07.14	4	excluded
C57 CTRL cohort 2 30.07.14	5	0.257685
C57 CTRL cohort 2 30.07.14	6	1.24202
C57 CTRL cohort 2 30.07.14	7	2.58356
C57 CTRL cohort 2 30.07.14	8	1.90511
C57 CTRL cohort 2 30.07.14	9	1.30405
C57 CTRL cohort 2 30.07.14	10	0.236363
C57 CTRL cohort 2 30.07.14	11	1.59579
C57 CTRL cohort 2 30.07.14	12	1.23701
C57 CTRL cohort 2 30.07.14	13	0.978723
C57 CTRL cohort 3 20.11.14	1	excluded
C57 CTRL cohort 3 20.11.14	2	0.0616894
C57 CTRL cohort 3 20.11.14	3	excluded
C57 CTRL cohort 3 20.11.14	4	2.45544
C57 CTRL cohort 3 20.11.14	5	4.39758
C57 CTRL cohort 3 20.11.14	6	excluded
C57 CTRL cohort 3 20.11.14	7	0.00853222
C57 CTRL cohort 3 20.11.14	8	0.0522422
C57 CTRL cohort 3 20.11.14	9	1.29935
C57 CTRL cohort 3 20.11.14	10	0.100573
C57 CTRL cohort 3 20.11.14	11	excluded
C57 VPA cohort 1 20.06.14	1	0.805703
C57 VPA cohort 1 20.06.14	2	0.269989
C57 VPA cohort 1 20.06.14	3	2.18942
C57 VPA cohort 1 20.06.14	4	1.64007
C57 VPA cohort 1 20.06.14	5	1.354
C57 VPA cohort 1 20.06.14	6	13.7046
C57 VPA cohort 1 20.06.14	7	0.64373
C57 VPA cohort 1 20.06.14	8	0.992844
C57 VPA cohort 1 20.06.14	9	7.18495
C57 VPA cohort 1 20.06.14	10	4.1267
C57 VPA cohort 1 20.06.14	11	1.77838
C57 VPA cohort 1 20.06.14	12	3.712
C57 VPAcohort 2 28.10.2014	1	2.31415
C57 VPAcohort 2 28.10.2014	2	3.00613
C57 VPAcohort 2 28.10.2014	3	1.16903
C57 VPAcohort 2 28.10.2014	4	15.3678
C57 VPAcohort 2 28.10.2014	5	0.308171
C57 VPAcohort 2 28.10.2014	6	0.462045
C57 VPAcohort 2 28.10.2014	7	11.7571
C57 VPA cohort 3 27.03.15	1	0.451837
C57 VPA cohort 3 27.03.15	2	0.619803
C57 VPA cohort 3 27.03.15	3	2.48813
C57 VPA cohort 3 27.03.15	4	0.313614
C57 VPA cohort 3 27.03.15	5	1.42382
C57 VPA cohort 3 27.03.15	6	0.98796
C57 VPA cohort 3 27.03.15	7	1.02885
