# Supplementary material for: Eco-HAB as a fully automated and ecologically relevant assessment of social impairments in mouse models of autism
Source: eLife. 2016 Oct 12;5:e19532. doi: 10.7554/eLife.19532 (PMC5092044; doi:10.7554/eLife.19532)
Supplement: Figure 3—source data 3. — The names of the Excel sheets refer to corresponding figures and contain data used for analysis of the behavioral measures obtained by the implementation of Eco-HAB.py software (see Materials and methods). DOI: http://dx.doi.org/10.7554/eLife.19532.014 [file elife-19532-fig3-data3.xlsx]

## Sheet: Sheet1
cohort name and date of the exeriment	no.of animal within a cohort	Eco-HAB social preference score
BALB CTRL cohort 1 12.06.14	1	1.8375
BALB CTRL cohort 1 12.06.14	2	excluded
BALB CTRL cohort 1 12.06.14	3	0.373205
BALB CTRL cohort 1 12.06.14	4	0.558509
BALB CTRL cohort 1 12.06.14	5	0.533318
BALB CTRL cohort 1 12.06.14	6	1.01736
BALB CTRL cohort 1 12.06.14	7	1.35288
BALB CTRL cohort 1 12.06.14	8	0.521053
BALB CTRL cohort 1 12.06.14	9	0.373854
BALB CTRL cohort 1 12.06.14	10	1.02578
BALB CTRL cohort 1 12.06.14	11	1.94302
BALB CTRL cohort 1 12.06.14	12	11.2875
BALB CTRL cohort 1 12.06.14	13	0.696218
BALB CTRL cohort 2 09.09.14	1	2.20607
BALB CTRL cohort 2 09.09.14	2	0.948254
BALB CTRL cohort 2 09.09.14	3	0.932323
BALB CTRL cohort 2 09.09.14	4	excluded
BALB CTRL cohort 2 09.09.14	5	0.389004
BALB CTRL cohort 2 09.09.14	6	0.823042
BALB CTRL cohort 2 09.09.14	7	1.20778
BALB CTRL cohort 2 09.09.14	8	0.863948
BALB VPA cohort 1 16.06.14	1	3.62802
BALB VPA cohort 1 16.06.14	2	1.02829
BALB VPA cohort 1 16.06.14	3	3.1065
BALB VPA cohort 1 16.06.14	4	1.28796
BALB VPA cohort 1 16.06.14	5	9.38169
BALB VPA cohort 1 16.06.14	6	10.7721
BALB VPA cohort 1 16.06.14	7	1.41884
BALB VPA cohort 1 16.06.14	8	1.67304
BALB VPA cohort 1 16.06.14	9	1.91279
BALB VPA cohort 1 16.06.14	10	4.86921
BALB VPA cohort 1 16.06.14	11	4.33566
BALB VPA cohort 1 16.06.14	12	excluded
BALB VPA cohort 2 23.03.15	1	1.73491
BALB VPA cohort 2 23.03.15	2	1.33739
BALB VPA cohort 2 23.03.15	3	1.14773
BALB VPA cohort 2 23.03.15	4	5.17859
BALB VPA cohort 2 23.03.15	5	0.910649
BALB VPA cohort 2 23.03.15	6	1.63032
BALB VPA cohort 2 23.03.15	7	1.06688
