# Supplementary material for: Eco-HAB as a fully automated and ecologically relevant assessment of social impairments in mouse models of autism
Source: eLife. 2016 Oct 12;5:e19532. doi: 10.7554/eLife.19532 (PMC5092044; doi:10.7554/eLife.19532)
Supplement: Figure 4—source data 1. — The names of the Excel sheets refer to corresponding figures and contain data used for analysis of the behavioral measures obtained by the implementation of Eco-HAB.py software (see 'Materials and methods'). DOI: http://dx.doi.org/10.7554/eLife.19532.019 [file elife-19532-fig4-data1.xlsx]

## Sheet: Sheet1
cohort name and date of the exeriment	no.of animal within a cohort	Eco-HAB social preference score
FX KO cohort 1 29.09.14	1	1.39772
FX KO cohort 1 29.09.14	2	4.31664
FX KO cohort 1 29.09.14	3	1.00112
FX KO cohort 1 29.09.14	4	0.343191
FX KO cohort 1 29.09.14	5	29.9792
FX KO cohort 1 29.09.14	6	4.36306
FX KO cohort 1 29.09.14	7	excluded
FX KO cohort 1 29.09.14	8	2.74368
FX KO cohort 2 16.02.15.	1	2.78372
FX KO cohort 2 16.02.15.	2	0.854946
FX KO cohort 2 16.02.15.	3	0.26418
FX KO cohort 2 16.02.15.	4	0.335514
FX KO cohort 2 16.02.15.	5	1.29058
FX KO cohort 2 16.02.15.	6	0.321978
FX KO cohort 2 16.02.15.	7	0.296195
FX KO cohort 2 16.02.15.	8	0.772276
FX KO cohort 3 20.02.15	1	0.198035
FX KO cohort 3 20.02.15	2	0.196108
FX KO cohort 3 20.02.15	3	0.227168
FX KO cohort 3 20.02.15	4	0.801115
FX KO cohort 3 20.02.15	5	0.0964957
FX KO cohort 3 20.02.15	6	excluded
FX KO cohort 3 20.02.15	7	0.352485
FX KO cohort 3 20.02.15	8	0.323552
FX WT cohort 1 11.02.15.	1	19.1682
FX WT cohort 1 11.02.15.	2	4.98323
FX WT cohort 1 11.02.15.	3	4.04194
FX WT cohort 1 11.02.15.	4	5.56219
FX WT cohort 1 11.02.15.	5	4.44309
FX WT cohort 1 11.02.15.	6	2.51129
FX WT cohort 1 11.02.15.	7	0.630204
FX WT cohort 1 11.02.15.	8	18.9022
FX WT cohort 1 11.02.15.	9	12.3613
FX WT cohort 1 11.02.15.	10	4.33147
FX WT cohort 2 18.05.16.	1	57.8835
FX WT cohort 2 18.05.16.	2	90.1057
FX WT cohort 2 18.05.16.	3	16.0008
FX WT cohort 2 18.05.16.	4	40.744
FX WT cohort 2 18.05.16.	5	44.6536
FX WT cohort 2 18.05.16.	6	0.632852
FX WT cohort 2 18.05.16.	7	12.2286
FX WT cohort 2 18.05.16.	8	4.5442
