# Supplementary material for: Eco-HAB as a fully automated and ecologically relevant assessment of social impairments in mouse models of autism
Source: eLife. 2016 Oct 12;5:e19532. doi: 10.7554/eLife.19532 (PMC5092044; doi:10.7554/eLife.19532)
Supplement: Figure 4—source data 2. — The names of the Excel sheetsrefer to corresponding figures and contain data used for analysis of the behavioral measures obtained by the implementation of Eco-HAB.py software (see 'Materials and methods'). DOI: http://dx.doi.org/10.7554/eLife.19532.020 [file elife-19532-fig4-data2.xlsx]

## Sheet: raw data
Eco-HAB measure of in-cohort sociability - each column represents score for a given pair of mice tested together within a given cohort
Fmr1 KO	0.058938	-0.007489	-0.02211	0.065165	0.015307	0.063944	-0.029689	0.005042	0.056266	-0.052147	0.004634	-0.01923	0.022387	0.027712	0.048621	0.028872	0.031478	0.006696	0.022494	-0.001008	0.044605	0.020629	-0.02744	-0.006607	0.024097	-0.001379	-0.042174	0.012408	-0.031849	-0.057089	-0.003867	0.040248	0.05896	0.026486	0.009037	-0.062611	-0.017181	0.123342	0.143859	0.018844	0.083327	0.090669	-0.050273	-0.065507	-4.1e-05	0.088652	-0.063692	-0.041466	-0.074312
Fmr1 WT	0.053812	0.113002	0.097075	0.060086	0.107407	-0.058915	0.20246	0.08376	0.132939	0.033747	0.084785	0.062147	0.095422	0.001799	0.073512	0.079638	0.110265	0.083232	0.080159	0.106303	0.01267	0.111261	0.074305	0.072	0.113581	0.084617	0.007601	0.106399	0.062776	0.076743	0.100643	0.031971	0.081711	0.117911	0.060094	0.063758	0.143975	0.109305	0.074062	0.02781	0.047145	0.026395	0.106925	0.094869	0.009831	0.140023	0.155783	0.116597	0.064627
[truncated: 27 more columns]
