# Supplementary material for: Eco-HAB as a fully automated and ecologically relevant assessment of social impairments in mouse models of autism
Source: eLife. 2016 Oct 12;5:e19532. doi: 10.7554/eLife.19532 (PMC5092044; doi:10.7554/eLife.19532)
Supplement: Figure 5—source data 1. — These data are identical to Figure 3A—source data 1, Figure 3E—source data 3, Figure 4A—source data 1 with respect to Figures 3A,E and 4A and are available as a separate file for the readers’ convenience. DOI: http://dx.doi.org/10.7554/eLife.19532.022 [file elife-19532-fig5-data1.xlsx]

## Sheet: Sheet1
cohort name and date of the exeriment	no.of animal within a cohort	Eco-HAB raw score	Eco-HAB score logarithmic scale
BALB CTRL cohort 1 12.06.14	1	1.8375	0.608406
BALB CTRL cohort 1 12.06.14	2	excluded
BALB CTRL cohort 1 12.06.14	3	0.373205	-0.985629
BALB CTRL cohort 1 12.06.14	4	0.558509	-0.582484
BALB CTRL cohort 1 12.06.14	5	0.533318	-0.628637
BALB CTRL cohort 1 12.06.14	6	1.01736	0.0172087
BALB CTRL cohort 1 12.06.14	7	1.35288	0.302234
BALB CTRL cohort 1 12.06.14	8	0.521053	-0.651903
BALB CTRL cohort 1 12.06.14	9	0.373854	-0.983891
BALB CTRL cohort 1 12.06.14	10	1.02578	0.0254495
BALB CTRL cohort 1 12.06.14	11	1.94302	0.664245
BALB CTRL cohort 1 12.06.14	12	11.2875	2.4237
BALB CTRL cohort 1 12.06.14	13	0.696218	-0.362092
BALB CTRL cohort 2 09.09.14	1	2.20607	0.791214
BALB CTRL cohort 2 09.09.14	2	0.948254	-0.0531334
BALB CTRL cohort 2 09.09.14	3	0.932323	-0.0700754
BALB CTRL cohort 2 09.09.14	4	excluded
BALB CTRL cohort 2 09.09.14	5	0.389004	-0.944164
BALB CTRL cohort 2 09.09.14	6	0.823042	-0.194748
BALB CTRL cohort 2 09.09.14	7	1.20778	0.188781
BALB CTRL cohort 2 09.09.14	8	0.863948	-0.146242
BALB VPA cohort 1 16.06.14	1	3.62802	1.28869
BALB VPA cohort 1 16.06.14	2	1.02829	0.0278928
BALB VPA cohort 1 16.06.14	3	3.1065	1.1335
BALB VPA cohort 1 16.06.14	4	1.28796	0.253062
BALB VPA cohort 1 16.06.14	5	9.38169	2.23876
BALB VPA cohort 1 16.06.14	6	10.7721	2.37696
BALB VPA cohort 1 16.06.14	7	1.41884	0.349842
BALB VPA cohort 1 16.06.14	8	1.67304	0.514642
BALB VPA cohort 1 16.06.14	9	1.91279	0.648565
BALB VPA cohort 1 16.06.14	10	4.86921	1.58293
BALB VPA cohort 1 16.06.14	11	4.33566	1.46687
BALB VPA cohort 1 16.06.14	12	excluded
BALB VPA cohort 2 23.03.15	1	1.73491	0.550954
BALB VPA cohort 2 23.03.15	2	1.33739	0.290717
BALB VPA cohort 2 23.03.15	3	1.14773	0.13779
BALB VPA cohort 2 23.03.15	4	5.17859	1.64453
BALB VPA cohort 2 23.03.15	5	0.910649	-0.0935977
BALB VPA cohort 2 23.03.15	6	1.63032	0.488779
BALB VPA cohort 2 23.03.15	7	1.06688	0.0647365
