# Supplementary material for: Eco-HAB as a fully automated and ecologically relevant assessment of social impairments in mouse models of autism
Source: eLife. 2016 Oct 12;5:e19532. doi: 10.7554/eLife.19532 (PMC5092044; doi:10.7554/eLife.19532)
Supplement: Figure 5—source data 2. — These data are identical to Figure 3A—source data 1, Figure 3E—source data 3, Figure 4A—source data 1 with respect to Figures 3A,E and 4A and are available as a separate file for the readers’ convenience. DOI: http://dx.doi.org/10.7554/eLife.19532.023 [file elife-19532-fig5-data2.xlsx]

## Sheet: Sheet1
cohort name and date of the exeriment	no.of animal within a cohort	Eco-HAB social preference score	Eco-HAB score logarithmic scale
C57 CTRL cohort 1 25.07.14	1	1.42178	0.351912
C57 CTRL cohort 1 25.07.14	2	0.904401	-0.100482
C57 CTRL cohort 1 25.07.14	3	0.419516	-0.868654
C57 CTRL cohort 1 25.07.14	4	0.677242	-0.389727
C57 CTRL cohort 1 25.07.14	5	0.73486	-0.308075
C57 CTRL cohort 1 25.07.14	6	excluded
C57 CTRL cohort 1 25.07.14	7	0.591401	-0.525261
C57 CTRL cohort 1 25.07.14	8	0.458453	-0.779897
C57 CTRL cohort 1 25.07.14	9	1.52517	0.422108
C57 CTRL cohort 1 25.07.14	10	0.870519	-0.138666
C57 CTRL cohort 1 25.07.14	11	2.55971	0.939895
C57 CTRL cohort 1 25.07.14	12	0.544321	-0.608216
C57 CTRL cohort 1 25.07.14	13	0.630501	-0.461241
C57 CTRL cohort 2 30.07.14	1	5.00691	1.61082
C57 CTRL cohort 2 30.07.14	2	1.5378	0.430354
C57 CTRL cohort 2 30.07.14	3	0.147912	-1.91114
C57 CTRL cohort 2 30.07.14	4	excluded
C57 CTRL cohort 2 30.07.14	5	0.257685	-1.35602
C57 CTRL cohort 2 30.07.14	6	1.24202	0.216738
C57 CTRL cohort 2 30.07.14	7	2.58356	0.949167
C57 CTRL cohort 2 30.07.14	8	1.90511	0.644538
C57 CTRL cohort 2 30.07.14	9	1.30405	0.265477
C57 CTRL cohort 2 30.07.14	10	0.236363	-1.44239
C57 CTRL cohort 2 30.07.14	11	1.59579	0.467372
C57 CTRL cohort 2 30.07.14	12	1.23701	0.212698
C57 CTRL cohort 2 30.07.14	13	0.978723	-0.021507
C57 CTRL cohort 3 20.11.14	1	excluded
C57 CTRL cohort 3 20.11.14	2	0.0616894	-2.78564
C57 CTRL cohort 3 20.11.14	3	excluded
C57 CTRL cohort 3 20.11.14	4	2.45544	0.898307
C57 CTRL cohort 3 20.11.14	5	4.39758	1.48105
C57 CTRL cohort 3 20.11.14	6	excluded
C57 CTRL cohort 3 20.11.14	7	0.00853222	-4.76391
C57 CTRL cohort 3 20.11.14	8	0.0522422	-2.95187
C57 CTRL cohort 3 20.11.14	9	1.29935	0.261862
C57 CTRL cohort 3 20.11.14	10	0.100573	-2.29687
C57 CTRL cohort 3 20.11.14	11	excluded
C57 VPA cohort 1 20.06.14	1	0.805703	-0.21604
C57 VPA cohort 1 20.06.14	2	0.269989	-1.30938
C57 VPA cohort 1 20.06.14	3	2.18942	0.783638
C57 VPA cohort 1 20.06.14	4	1.64007	0.494736
C57 VPA cohort 1 20.06.14	5	1.354	0.303061
C57 VPA cohort 1 20.06.14	6	13.7046	2.61773
C57 VPA cohort 1 20.06.14	7	0.64373	-0.440476
C57 VPA cohort 1 20.06.14	8	0.992844	-0.00718215
C57 VPA cohort 1 20.06.14	9	7.18495	1.97199
C57 VPA cohort 1 20.06.14	10	4.1267	1.41748
C57 VPA cohort 1 20.06.14	11	1.77838	0.575705
C57 VPA cohort 1 20.06.14	12	3.712	1.31157
C57 VPAcohort 2 28.10.2014	1	2.31415	0.839043
C57 VPAcohort 2 28.10.2014	2	3.00613	1.10065
C57 VPAcohort 2 28.10.2014	3	1.16903	0.156173
C57 VPAcohort 2 28.10.2014	4	15.3678	2.73228
C57 VPAcohort 2 28.10.2014	5	0.308171	-1.1771
C57 VPAcohort 2 28.10.2014	6	0.462045	-0.772092
C57 VPAcohort 2 28.10.2014	7	11.7571	2.46446
C57 VPA cohort 3 27.03.15	1	0.451837	-0.794433
C57 VPA cohort 3 27.03.15	2	0.619803	-0.478354
C57 VPA cohort 3 27.03.15	3	2.48813	0.91153
C57 VPA cohort 3 27.03.15	4	0.313614	-1.15959
C57 VPA cohort 3 27.03.15	5	1.42382	0.353346
C57 VPA cohort 3 27.03.15	6	0.98796	-0.0121133
C57 VPA cohort 3 27.03.15	7	1.02885	0.02844
