# Supplementary material for: Eco-HAB as a fully automated and ecologically relevant assessment of social impairments in mouse models of autism
Source: eLife. 2016 Oct 12;5:e19532. doi: 10.7554/eLife.19532 (PMC5092044; doi:10.7554/eLife.19532)
Supplement: Figure 5—source data 3 — These data are identical to Figure 3A—source data 1, Figure 3E—source data 3, Figure 4A—source data 1 with respect to Figures 3A,E and 4A and are available as a separate file for the readers’ convenience. DOI: http://dx.doi.org/10.7554/eLife.19532.024 [file elife-19532-fig5-data3.xlsx]

## Sheet: Sheet1
cohort name and date of the exeriment	no.of animal within a cohort	Eco-HAB social preference score	Eco-HAB score logarithmic scale
FX KO cohort 1 29.09.14	1	1.39772	0.334839
FX KO cohort 1 29.09.14	2	4.31664	1.46248
FX KO cohort 1 29.09.14	3	1.00112	0.00112187
FX KO cohort 1 29.09.14	4	0.343191	-1.06947
FX KO cohort 1 29.09.14	5	29.9792	3.4005
FX KO cohort 1 29.09.14	6	4.36306	1.47317
FX KO cohort 1 29.09.14	7	excluded
FX KO cohort 1 29.09.14	8	2.74368	1.0093
FX KO cohort 2 16.02.15.	1	2.78372	1.02379
FX KO cohort 2 16.02.15.	2	0.854946	-0.156717
FX KO cohort 2 16.02.15.	3	0.26418	-1.33113
FX KO cohort 2 16.02.15.	4	0.335514	-1.09209
FX KO cohort 2 16.02.15.	5	1.29058	0.255093
FX KO cohort 2 16.02.15.	6	0.321978	-1.13327
FX KO cohort 2 16.02.15.	7	0.296195	-1.21674
FX KO cohort 2 16.02.15.	8	0.772276	-0.258413
FX KO cohort 3 20.02.15	1	0.198035	-1.61931
FX KO cohort 3 20.02.15	2	0.196108	-1.62909
FX KO cohort 3 20.02.15	3	0.227168	-1.48207
FX KO cohort 3 20.02.15	4	0.801115	-0.221751
FX KO cohort 3 20.02.15	5	0.0964957	-2.33826
FX KO cohort 3 20.02.15	6	excluded
FX KO cohort 3 20.02.15	7	0.352485	-1.04275
FX KO cohort 3 20.02.15	8	0.323552	-1.1284
FX WT cohort 1 11.02.15.	1	19.1682	2.95325
FX WT cohort 1 11.02.15.	2	4.98323	1.60608
FX WT cohort 1 11.02.15.	3	4.04194	1.39673
FX WT cohort 1 11.02.15.	4	5.56219	1.71599
FX WT cohort 1 11.02.15.	5	4.44309	1.49135
FX WT cohort 1 11.02.15.	6	2.51129	0.920796
FX WT cohort 1 11.02.15.	7	0.630204	-0.461712
FX WT cohort 1 11.02.15.	8	18.9022	2.93928
FX WT cohort 1 11.02.15.	9	12.3613	2.51457
FX WT cohort 1 11.02.15.	10	4.33147	1.46591
FX WT cohort 2 18.05.16.	1	57.8835	4.05843
FX WT cohort 2 18.05.16.	2	90.1057	4.50098
FX WT cohort 2 18.05.16.	3	16.0008	2.77264
FX WT cohort 2 18.05.16.	4	40.744	3.70731
FX WT cohort 2 18.05.16.	5	44.6536	3.79893
FX WT cohort 2 18.05.16.	6	0.632852	-0.457518
FX WT cohort 2 18.05.16.	7	12.2286	2.50377
FX WT cohort 2 18.05.16.	8	4.5442	1.51385
