# Supplementary material for: Eco-HAB as a fully automated and ecologically relevant assessment of social impairments in mouse models of autism
Source: eLife. 2016 Oct 12;5:e19532. doi: 10.7554/eLife.19532 (PMC5092044; doi:10.7554/eLife.19532)
Supplement: Figure 6—source data 2. — The names of the Excel sheetsrefer to corresponding figures and contain data used for analysis of the behavioral measures obtained by the implementation of Eco-HAB.py software (see Materials and methods). DOI: http://dx.doi.org/10.7554/eLife.19532.027 [file elife-19532-fig6-data2.xlsx]

## Sheet: Sheet1
cohort name and date of the exeriment	no.of animal within a cohort	Eco-HAB social preference score	Eco-HAB score logarithmic scale
FX KO cohort 4 10.05.2016	1	1.02522	0.024912
FX KO cohort 4 10.05.2016	2	0.137589	-1.98348
FX KO cohort 4 10.05.2016	3	2.98731	1.09437
FX KO cohort 4 10.05.2016	4	2.16734	0.7735
FX KO cohort 4 10.05.2016	5	0.296893	-1.21438
FX KO cohort 4 10.05.2016	6	0.980954	-0.0192292
FX KO cohort 4 10.05.2016	7	0.416776	-0.875206
FX KO cohort 4 10.05.2016	8	1.50974	0.411939
FX KO cohort 4 10.05.2016	9	0.60731	-0.498716
FX KO cohort 4 10.05.2016	10	0.074273	-2.60001
FX KO cohort 4 10.05.2016	11	2.76944	1.01864
FX WT cohort 3 14.05.2016	1	9.67995	2.27006
FX WT cohort 3 14.05.2016	2	1.16702	0.154453
FX WT cohort 3 14.05.2016	3	5.52936	1.71007
FX WT cohort 3 14.05.2016	4	9.33178	2.23343
FX WT cohort 3 14.05.2016	5	4.45777	1.49465
FX WT cohort 3 14.05.2016	6	5.03884	1.61718
FX WT cohort 3 14.05.2016	7	4.84101	1.57712
FX WT cohort 3 14.05.2016	8	2.66308	0.979483
FX WT cohort 3 14.05.2016	9	1.7242	0.544766
