# Supplementary material for: Eco-HAB as a fully automated and ecologically relevant assessment of social impairments in mouse models of autism
Source: eLife. 2016 Oct 12;5:e19532. doi: 10.7554/eLife.19532 (PMC5092044; doi:10.7554/eLife.19532)
Supplement: Figure 8—source data 1. — The names of the Excel sheetsrefer to corresponding figures and contain data used for analysis of the behavioral measures obtained by the implementation of Eco-HAB.py software (see Materials and methods). DOI: http://dx.doi.org/10.7554/eLife.19532.032 [file elife-19532-fig8-data1.xlsx]

## Sheet: Sheet1
		repetition 1. 14.05.2016			repetition 2. 26.05.2016
cohort name	no.of animal within a cohort	Eco-HAB. social preference score	Eco-HAB score logarithmic scale		Eco-HAB social preference score	Eco-HAB score logarithmic scale
FX WT cohort 3	1	9.67995	2.27006		4.9818	1.60579
FX WT cohort 3	2	1.16702	0.154453		1.23766	0.213221
FX WT cohort 3	3	5.52936	1.71007		3.96501	1.37751
FX WT cohort 3	4	9.33178	2.23343		127.47	4.84788
FX WT cohort 3	5	4.45777	1.49465		2.54503	0.934143
FX WT cohort 3	6	5.03884	1.61718		1.08797	0.0843132
FX WT cohort 3	7	4.84101	1.57712		3.87337	1.35412
FX WT cohort 3	8	2.66308	0.979483		11.4474	2.43776
FX WT cohort 3	9	1.7242	0.544766		84.4955	4.4367
