# Supplementary material for: Eco-HAB as a fully automated and ecologically relevant assessment of social impairments in mouse models of autism
Source: eLife. 2016 Oct 12;5:e19532. doi: 10.7554/eLife.19532 (PMC5092044; doi:10.7554/eLife.19532)
Supplement: Figure 8—source data 2. — The names of the Excel sheetsrefer to corresponding figures and contain data used for analysis of the behavioral measures obtained by the implementation of Eco-HAB.py software (see Materials and methods). DOI: http://dx.doi.org/10.7554/eLife.19532.033 [file elife-19532-fig8-data2.xlsx]

## Sheet: Sheet1
		repetition 1. 10.05.2016			repetition 2. 22.05.2016
cohort name	no.of animal within a cohort	Eco-HAB. social preference score	Eco-HAB score logarithmic scale		Eco-HAB social preference score	Eco-HAB score logarithmic scale
FX KO cohort 4	1	1.02522	0.024912		0.410921	-0.889354
FX KO cohort 4	2	0.137589	-1.98348		0.601019	-0.509129
FX KO cohort 4	3	2.98731	1.09437		0.886805	-0.12013
FX KO cohort 4	4	2.16734	0.7735		1.12041	0.113691
FX KO cohort 4	5	0.296893	-1.21438		0.75385	-0.282562
FX KO cohort 4	6	0.980954	-0.0192292		0.170091	-1.77142
FX KO cohort 4	7	0.416776	-0.875206		0.288498	-1.24307
FX KO cohort 4	8	1.50974	0.411939		0.309733	-1.17205
FX KO cohort 4	9	0.60731	-0.498716		0.8347	-0.180683
FX KO cohort 4	10	0.074273	-2.60001		0.621461	-0.475682
FX KO cohort 4	11	2.76944	1.01864		0.957776	-0.0431415
