# Supplementary material for: Eco-HAB as a fully automated and ecologically relevant assessment of social impairments in mouse models of autism
Source: eLife. 2016 Oct 12;5:e19532. doi: 10.7554/eLife.19532 (PMC5092044; doi:10.7554/eLife.19532)
Supplement: Figure 9—source data 1. — Figure 9 depicts correlation between those two variables. DOI: http://dx.doi.org/10.7554/eLife.19532.035 [file elife-19532-fig9-data1.xlsx]

## Sheet: analysed data
cohort name and date of the exeriment	no.of animal within a cohort	U-tube dominance score	Eco-HAB. measured activity (no. of visits during 1st 12h of adaptation period)
C57 CTRL cohort 2 30.07.14	1	0.45	909
C57 CTRL cohort 2 30.07.14	2	0.18	814
C57 CTRL cohort 2 30.07.14	3	0.18	347
C57 CTRL cohort 2 30.07.14	4	0.45	1341
C57 CTRL cohort 2 30.07.14	5	0.55	1179
C57 CTRL cohort 2 30.07.14	6	0.73	1024
C57 CTRL cohort 2 30.07.14	7	0.73	893
C57 CTRL cohort 2 30.07.14	8	0.55	1152
C57 CTRL cohort 2 30.07.14	9	0.36	1382
C57 CTRL cohort 2 30.07.14	10	0.36	936
C57 CTRL cohort 2 30.07.14	11	0.91	838
C57 CTRL cohort 2 30.07.14	12	0.55	943
C57 CTRL cohort 3 20.11.14	1	0.4	782
C57 CTRL cohort 3 20.11.14	2	0.5	838
C57 CTRL cohort 3 20.11.14	3	0.6	833
C57 CTRL cohort 3 20.11.14	4	0	683
C57 CTRL cohort 3 20.11.14	5	0.6	881
C57 CTRL cohort 3 20.11.14	6	0.7	1063
C57 CTRL cohort 3 20.11.14	7	0.3	755
C57 CTRL cohort 3 20.11.14	8	0.4	488
C57 CTRL cohort 3 20.11.14	9	1	933
C57 CTRL cohort 3 20.11.14	10	0.1	1064
C57 CTRL cohort 3 20.11.14	11	0.2	800
C57 VPA cohort 1 20.06.14	1	0.55	1045
C57 VPA cohort 1 20.06.14	2	0.82	618
C57 VPA cohort 1 20.06.14	3	0.36	850
C57 VPA cohort 1 20.06.14	4	0.09	593
C57 VPA cohort 1 20.06.14	5	0.64	639
C57 VPA cohort 1 20.06.14	6	0.82	598
C57 VPA cohort 1 20.06.14	7	0.36	872
C57 VPA cohort 1 20.06.14	8	0.64	589
C57 VPA cohort 1 20.06.14	9	0.36	560
C57 VPA cohort 1 20.06.14	10	0.55	717
C57 VPA cohort 1 20.06.14	11	0.09	652
C57 VPA cohort 1 20.06.14	12	0.73	703
C57 VPA cohort 3 27.03.15	2	0.78	1014
C57 VPA cohort 3 27.03.15	3	0.11	663
C57 VPA cohort 3 27.03.15	4	0.56	870
C57 VPA cohort 3 27.03.15	5	0.33	894
C57 VPA cohort 3 27.03.15	6	0.78	633
C57 VPA cohort 3 27.03.15	7	0.56	805

## Sheet: list with lacking data
cohort name and date of the exeriment	no.of animal within a cohort	U-tube dominance score	Eco-HAB. measured activity (no. of visits during 1st 12h of adaptation period)
C57 CTRL cohort 1 25.07.14	1	no data	1119
C57 CTRL cohort 1 25.07.14	2	no data	1384
C57 CTRL cohort 1 25.07.14	3	no data	1397
C57 CTRL cohort 1 25.07.14	4	no data	925
C57 CTRL cohort 1 25.07.14	5	no data	1068
C57 CTRL cohort 1 25.07.14	6	no data	1211
C57 CTRL cohort 1 25.07.14	7	no data	1618
C57 CTRL cohort 1 25.07.14	8	no data	1070
C57 CTRL cohort 1 25.07.14	9	no data	1070
C57 CTRL cohort 1 25.07.14	10	no data	974
C57 CTRL cohort 1 25.07.14	11	no data	1013
C57 CTRL cohort 1 25.07.14	12	no data	1589
C57 CTRL cohort 1 25.07.14	13	no data	no data
C57 CTRL cohort 2 30.07.14	1	0.45	909
C57 CTRL cohort 2 30.07.14	2	0.18	814
C57 CTRL cohort 2 30.07.14	3	0.18	347
C57 CTRL cohort 2 30.07.14	4	0.45	1341
C57 CTRL cohort 2 30.07.14	5	0.55	1179
C57 CTRL cohort 2 30.07.14	6	0.73	1024
C57 CTRL cohort 2 30.07.14	7	0.73	893
C57 CTRL cohort 2 30.07.14	8	0.55	1152
C57 CTRL cohort 2 30.07.14	9	0.36	1382
C57 CTRL cohort 2 30.07.14	10	0.36	936
C57 CTRL cohort 2 30.07.14	11	0.91	838
C57 CTRL cohort 2 30.07.14	12	0.55	943
C57 CTRL cohort 2 30.07.14	13	no data	no data
C57 CTRL cohort 3 20.11.14	1	0.4	782
C57 CTRL cohort 3 20.11.14	2	0.5	838
C57 CTRL cohort 3 20.11.14	3	0.6	833
C57 CTRL cohort 3 20.11.14	4	0	683
C57 CTRL cohort 3 20.11.14	5	0.6	881
C57 CTRL cohort 3 20.11.14	6	0.7	1063
C57 CTRL cohort 3 20.11.14	7	0.3	755
C57 CTRL cohort 3 20.11.14	8	0.4	488
C57 CTRL cohort 3 20.11.14	9	1	933
C57 CTRL cohort 3 20.11.14	10	0.1	1064
C57 CTRL cohort 3 20.11.14	11	0.2	800
C57 VPA cohort 1 20.06.14	1	0.55	1045
C57 VPA cohort 1 20.06.14	2	0.82	618
C57 VPA cohort 1 20.06.14	3	0.36	850
C57 VPA cohort 1 20.06.14	4	0.09	593
C57 VPA cohort 1 20.06.14	5	0.64	639
C57 VPA cohort 1 20.06.14	6	0.82	598
C57 VPA cohort 1 20.06.14	7	0.36	872
C57 VPA cohort 1 20.06.14	8	0.64	589
C57 VPA cohort 1 20.06.14	9	0.36	560
C57 VPA cohort 1 20.06.14	10	0.55	717
C57 VPA cohort 1 20.06.14	11	0.09	652
C57 VPA cohort 1 20.06.14	12	0.73	703
C57 VPAcohort 2 28.10.2014	1	0.14	no data
C57 VPAcohort 2 28.10.2014	2	0.71	no data
C57 VPAcohort 2 28.10.2014	3	0.57	no data
C57 VPAcohort 2 28.10.2014	4	0	no data
C57 VPAcohort 2 28.10.2014	5	0.29	no data
C57 VPAcohort 2 28.10.2014	6	0.57	no data
C57 VPAcohort 2 28.10.2014	7	0.86	no data
C57 VPA cohort 3 27.03.15	1	0.86	no data
C57 VPA cohort 3 27.03.15	2	0.78	1014
C57 VPA cohort 3 27.03.15	3	0.11	663
C57 VPA cohort 3 27.03.15	4	0.56	870
C57 VPA cohort 3 27.03.15	5	0.33	894
C57 VPA cohort 3 27.03.15	6	0.78	633
C57 VPA cohort 3 27.03.15	7	0.56	805
