# Supplementary material for: Eco-HAB as a fully automated and ecologically relevant assessment of social impairments in mouse models of autism
Source: eLife. 2016 Oct 12;5:e19532. doi: 10.7554/eLife.19532 (PMC5092044; doi:10.7554/eLife.19532)
Supplement: Figure 9—source data 2. — Figure 9 depicts correlation between those two variables. DOI: http://dx.doi.org/10.7554/eLife.19532.036 [file elife-19532-fig9-data2.xlsx]

## Sheet: Sheet1
cohort name and date of the exeriment	no.of animal within a cohort	U-tube dominance score	Eco-HAB. measured activity (no. of visits during 1st 12h of adaptation period)
BALB CTRL cohort 1 12.06.14	1	0.75	731
BALB CTRL cohort 1 12.06.14	2	0.3333	544
BALB CTRL cohort 1 12.06.14	3	0.25	558
BALB CTRL cohort 1 12.06.14	4	0.9167	653
BALB CTRL cohort 1 12.06.14	5	0.75	813
BALB CTRL cohort 1 12.06.14	6	0.6364	745
BALB CTRL cohort 1 12.06.14	7	0.25	967
BALB CTRL cohort 1 12.06.14	8	0.25	586
BALB CTRL cohort 1 12.06.14	9	0.6667	570
BALB CTRL cohort 1 12.06.14	10	0.5	557
BALB CTRL cohort 1 12.06.14	11	0.5	620
BALB CTRL cohort 1 12.06.14	12	0.25	516
BALB CTRL cohort 1 12.06.14	13	0.4545	700
BALB CTRL cohort 2 09.09.14	1	0.428571	963
BALB CTRL cohort 2 09.09.14	2	0.571429	457
BALB CTRL cohort 2 09.09.14	3	0.428571	1370
BALB CTRL cohort 2 09.09.14	4	0.285714	283
BALB CTRL cohort 2 09.09.14	5	0.714286	875
BALB CTRL cohort 2 09.09.14	6	0.428571	973
BALB CTRL cohort 2 09.09.14	7	0.714286	844
BALB CTRL cohort 2 09.09.14	8	0.285714	820
BALB VPA cohort 1 16.06.14	1	0.3636	366
BALB VPA cohort 1 16.06.14	2	0.3636	690
BALB VPA cohort 1 16.06.14	3	0.6364	741
BALB VPA cohort 1 16.06.14	4	0.8182	751
BALB VPA cohort 1 16.06.14	5	0.3636	1165
BALB VPA cohort 1 16.06.14	6	0.7273	336
BALB VPA cohort 1 16.06.14	7	0.1818	860
BALB VPA cohort 1 16.06.14	8	0.5455	671
BALB VPA cohort 1 16.06.14	9	0.8182	535
BALB VPA cohort 1 16.06.14	10	0.2727	608
BALB VPA cohort 1 16.06.14	11	0.2727	644
BALB VPA cohort 1 16.06.14	12	0.5455	338
BALB VPA cohort 2 23.03.15	1	0.73	818
BALB VPA cohort 2 23.03.15	2	0.27	559
BALB VPA cohort 2 23.03.15	3	0.91	648
BALB VPA cohort 2 23.03.15	4	0.18	447
BALB VPA cohort 2 23.03.15	5	0.64	988
BALB VPA cohort 2 23.03.15	6	0.18	948
BALB VPA cohort 2 23.03.15	7	0.73	940
